# Supplementary material for: Small‐molecule inhibition of aging‐associated chromosomal instability delays cellular senescence
Source: PubMed Central journal article supplement (PMC7202060; doi:10.15252/embr.201949248), 2020-03-05
Supplement: EMBR-21-e49248-s007.pdf [file EMBR-21-e49248-s007.pdf]

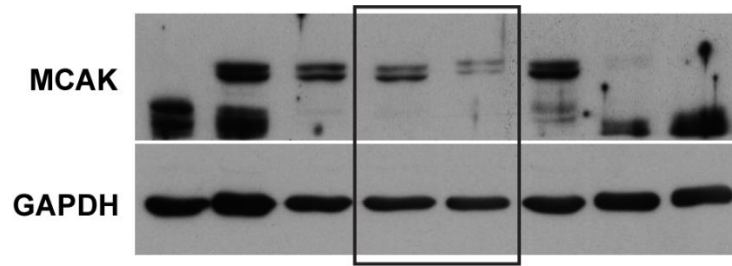

**Source Data 1.** Uncropped and unprocessed images of the Western blot results shown in Fig 1I.
